# Supplementary material for: Bacterial Communities Show Algal Host (Fucus spp.)/Zone Differentiation Across the Stress Gradient of the Intertidal Zone
Source: Front Microbiol. 2020 Sep 24;11:563118. doi: 10.3389/fmicb.2020.563118 (PMC7541829; doi:10.3389/fmicb.2020.563118)
Supplement: Supplementary file 6 [file Table_2.xlsx]

## Sheet: Sheet1
Final Sample Size of Bacterial Communities by Group
Sample	2016-07-06	2016-07-11	2016-07-20
Fucus spiralis Holdfast	6	-	5
Fucus spiralis Receptacle	6	-	6
Fucus spiralis Vegetative	6	-	6
Dry Holdfast	-	-	8
Dry Receptacle	-	-	5
Dry Vegetative	8	7	8
Watered Holdfast	-	-	8
Watered Receptacle	-	-	8
Watered Vegetative	7	8	8
Procedural Control Holdfast	-	-	7
Procedural Control Receptacle	-	-	8
Procedural Control Vegetative	7	7	8
Fucus vesiculosus Holdfast	6	-	5
Fucus vesiculosus Receptacle	6	-	5
Fucus vesiculosus Vegetative	6	-	6
Fucus distichus Holdfast	6	-	6
Fucus distichus Receptacle	6	-	6
Fucus distichus Vegetative	6	-	6
Water Column	3	-	6
