# Supplementary material for: Bacterial Communities Show Algal Host (Fucus spp.)/Zone Differentiation Across the Stress Gradient of the Intertidal Zone
Source: Front Microbiol. 2020 Sep 24;11:563118. doi: 10.3389/fmicb.2020.563118 (PMC7541829; doi:10.3389/fmicb.2020.563118)
Supplement: Supplementary file 11 [file Table_7.xlsx]

## Sheet: Sheet1
Top 10 Most Abundant ASVs (Mean ± SD) in Congeners and Transplant Treatments by Tissue and in the Water Column
ASV Rank	Fucus spiralis holdfast	Dry holdfast	Watered holdfast	Procedural control holdfast	Fucus vesiculosus holdfast	Fucus distichus holdfast	Fucus spiralis receptacle	Dry receptacle	Watered receptacle	Procedural control receptacle	Fucus vesiculosus receptacle	Fucus distichus receptacle	Fucus spiralis vegetative	Dry vegetative	Watered vegetative	Procedural control vegetative	Fucus vesiculosus vegetative	Fucus distichus vegetative	Water column
1	Octadecabacter_12436 (19 ± 16%)	Octadecabacter_12436 (24 ± 18%)	Octadecabacter_12436 (14 ± 13%)	Octadecabacter_12436 (15 ± 10%)	Octadecabacter_12254 (14 ± 20%)	Reinekea_6300 (44 ± 14%)	Granulosicoccus_3260 (42 ± 10%)	Psychromonas_8181 (27 ± 25%)	Granulosicoccus_3260 (20 ± 19%)	Granulosicoccus_3260 (36 ± 14%)	Granulosicoccus_3260 (38 ± 13%)	Granulosicoccus_3260 (23 ± 22%)	Granulosicoccus_3260 (36 ± 13%)	BurkholderiaCaballeroniaParaburkholderia_8371 (33 ± 44%)	BurkholderiaCaballeroniaParaburkholderia_8371 (32 ± 35%)	Granulosicoccus_3260 (34 ± 15%)	Granulosicoccus_3260 (43 ± 10%)	Granulosicoccus_3260 (31 ± 30%)	Clade Ia_11895 (9 ± 1%)
2	Paenirhodobacter_7667 (18 ± 15%)	Paenirhodobacter_7667 (10 ± 10%)	Paenirhodobacter_7667 (9 ± 8%)	Octadecabacter_2143 (13 ± 8%)	Octadecabacter_2143 (7 ± 7%)	BurkholderiaCaballeroniaParaburkholderia_8371 (6 ± 3%)	BurkholderiaCaballeroniaParaburkholderia_8371 (11 ± 18%)	Pseudoalteromonas_403 (18 ± 22%)	BurkholderiaCaballeroniaParaburkholderia_8371 (17 ± 27%)	Granulosicoccus_4211 (5 ± 5%)	Blastopirellula_628 (8 ± 2%)	Blastopirellula_628 (6 ± 2%)	BurkholderiaCaballeroniaParaburkholderia_8371 (17 ± 20%)	Granulosicoccus_3260 (28 ± 35%)	Granulosicoccus_3260 (32 ± 22%)	BurkholderiaCaballeroniaParaburkholderia_8371 (10 ± 23%)	Blastopirellula_628 (8 ± 3%)	BurkholderiaCaballeroniaParaburkholderia_8371 (10 ± 15%)	Amylibacter_14367 (9 ± 1%)
3	Sulfitobacter_7131 (8 ± 10%)	Psychromonas_8181 (8 ± 9%)	Octadecabacter_2143 (9 ± 7%)	Reinekea_6300 (7 ± 8%)	Octadecabacter_12436 (6 ± 6%)	Octadecabacter_12202 (4 ± 9%)	Blastopirellula_628 (5 ± 3%)	Granulosicoccus_3260 (15 ± 29%)	Marinomonas_11645 (13 ± 19%)	Blastopirellula_628 (5 ± 4%)	Granulosicoccus_4211 (7 ± 3%)	Granulosicoccus_3330 (4 ± 2%)	Blastopirellula_628 (5 ± 3%)	Alteromonas_8124 (5 ± 13%)	Psychromonas_8181 (4 ± 9%)	Blastopirellula_628 (7 ± 4%)	Granulosicoccus_4211 (6 ± 2%)	Saprospiraceae_ge_2988 (6 ± 3%)	Planktomarina_14512 (5 ± 1%)
4	Luteolibacter_5244 (8 ± 6%)	Luteolibacter_5244 (8 ± 11%)	Octadecabacter_12254 (6 ± 7%)	C1-B045_4568 (4 ± 3%)	Paenirhodobacter_7667 (5 ± 8%)	Octadecabacter_2143 (3 ± 8%)	Pricia_5417 (3 ± 1%)	Alteromonas_8124 (7 ± 6%)	Psychromonas_8181 (6 ± 8%)	Litorimonas_5725 (5 ± 4%)	Saprospiraceae_ge_2988 (5 ± 1%)	Saprospiraceae_ge_2988 (3 ± 1%)	Granulosicoccus_3316 (3 ± 1%)	Psychromonas_8181 (4 ± 5%)	Blastopirellula_628 (3 ± 3%)	Granulosicoccus_4211 (5 ± 2%)	Litorimonas_5725 (5 ± 2%)	Blastopirellula_628 (5 ± 2%)	SAR86_clade_ge_11838 (5 ± 1%)
5	BurkholderiaCaballeroniaParaburkholderia_8371 (8 ± 10%)	Octadecabacter_2143 (8 ± 7%)	BurkholderiaCaballeroniaParaburkholderia_8371 (5 ± 9%)	Octadecabacter_12254 (3 ± 3%)	BurkholderiaCaballeroniaParaburkholderia_8371 (4 ± 1%)	Granulosicoccus_13530 (3 ± 2%)	Granulosicoccus_3316 (3 ± 2%)	Psychromonas_8184 (7 ± 6%)	Reinekea_6300 (4 ± 11%)	Saprospiraceae_ge_2988 (3 ± 2%)	Litorimonas_5725 (4 ± 0%)	Granulosicoccus_787 (3 ± 3%)	Pricia_5417 (2 ± 1%)	Granulosicoccus_320 (2 ± 6%)	Litorimonas_5725 (2 ± 2%)	Litorimonas_5725 (5 ± 3%)	Rubritalea_4929 (3 ± 6%)	Litorimonas_5723 (4 ± 4%)	SUP05 cluster_10246 (5 ± 2%)
6	Octadecabacter_12254 (4 ± 7%)	Octadecabacter_12254 (5 ± 8%)	Reinekea_6300 (4 ± 4%)	Arcobacter_9542 (3 ± 7%)	Flavobacteriaceae_ge_13594 (3 ± 3%)	Algitalea_7007 (2 ± 1%)	Maribacter_5327 (2 ± 1%)	Psychromonas_12811 (6 ± 7%)	Alteromonas_8124 (2 ± 5%)	Psychromonas_8184 (2 ± 4%)	Blastopirellula_3586 (4 ± 1%)	Litorimonas_5723 (3 ± 2%)	Ilumatobacter_6062 (2 ± 1%)	Cellulophaga_71 (2 ± 6%)	Alteromonas_8124 (2 ± 4%)	Saprospiraceae_ge_2988 (3 ± 2%)	Saprospiraceae_ge_2988 (3 ± 1%)	Granulosicoccus_787 (4 ± 5%)	Candidatus_Actinomarina_2101 (5 ± 1%)
7	Octadecabacter_12134 (3 ± 5%)	Cobetia_10474 (5 ± 11%)	C1-B045_4568 (4 ± 3%)	Paenirhodobacter_7667 (2 ± 2%)	C1-B045_4568 (3 ± 1%)	Roseobacter_12218 (2 ± 3%)	Ilumatobacter_6062 (2 ± 1%)	Pseudoalteromonas_3471 (3 ± 3%)	Granulosicoccus_320 (2 ± 6%)	Arenicella_8053 (2 ± 1%)	Rhodobacteraceae_ge_7570 (3 ± 4%)	Granulosicoccus_4211 (3 ± 3%)	Granulosicoccus_323 (2 ± 2%)	Pseudoalteromonas_3471 (1 ± 4%)	Granulosicoccus_4211 (1 ± 1%)	Rhodobacteraceae_ge_7570 (2 ± 4%)	Blastopirellula_3586 (3 ± 2%)	Granulosicoccus_3330 (3 ± 2%)	Clade Ia_14312 (3 ± 0%)
8	Octadecabacter_2143 (3 ± 6%)	Paraglaciecola_8336 (2 ± 3%)	Luteolibacter_5244 (2 ± 4%)	Rhodobacteraceae_ge_12235 (2 ± 1%)	Arenicella_8053 (2 ± 2%)	Arenicella_14658 (1 ± 1%)	Rubripirellula_6949 (2 ± 1%)	Marinomonas_11645 (2 ± 4%)	Marinomonas_6203 (2 ± 4%)	Litorimonas_5990 (2 ± 1%)	Litorimonas_5990 (2 ± 0%)	Leucothrix_12607 (2 ± 4%)	Maribacter_5327 (1 ± 1%)	Pseudoalteromonas_403 (1 ± 3%)	Blastopirellula_3586 (1 ± 1%)	Litorimonas_5990 (2 ± 1%)	Litorimonas_5990 (2 ± 1%)	Granulosicoccus_4211 (2 ± 3%)	SUP05 cluster_10232 (3 ± 1%)
9	Acuticoccus_230 (2 ± 2%)	BurkholderiaCaballeroniaParaburkholderia_8371 (2 ± 6%)	Marinomonas_11645 (2 ± 3%)	Psychromonas_8184 (1 ± 2%)	Algitalea_1925 (2 ± 4%)	Rhodobacteraceae_ge_3228 (1 ± 2%)	Roseibacillus_10361 (1 ± 1%)	Paraglaciecola_8336 (2 ± 2%)	Blastopirellula_628 (1 ± 2%)	Rhodobacteraceae_ge_7570 (2 ± 2%)	BurkholderiaCaballeroniaParaburkholderia_8371 (2 ± 1%)	Leucothrix_7966 (2 ± 2%)	Granulosicoccus_320 (1 ± 3%)	Granulosicoccus_4211 (1 ± 1%)	Glaciecola_2832 (1 ± 2%)	Algitalea_7076 (2 ± 5%)	Rhodobacteraceae_ge_7570 (2 ± 3%)	Litorimonas_5990 (2 ± 1%)	SAR92_clade_11478 (3 ± 0%)
10	Paenirhodobacter_12532 (1 ± 3%)	Alteromonas_8124 (2 ± 2%)	Marinomonas_6203 (2 ± 4%)	Luteolibacter_5244 (1 ± 2%)	Marinagarivorans_13022 (2 ± 3%)	Octadecabacter_12254 (1 ± 0%)	Marinomonas_11645 (1 ± 3%)	Blastopirellula_628 (1 ± 2%)	Glaciecola_2832 (1 ± 3%)	BurkholderiaCaballeroniaParaburkholderia_8371 (1 ± 1%)	Rubritalea_4929 (2 ± 2%)	Robiginitomaculum_14071 (2 ± 1%)	Roseibacillus_10361 (1 ± 1%)	Rhodobacteraceae_ge_12519 (1 ± 2%)	Granulosicoccus_323 (1 ± 1%)	Blastopirellula_3586 (2 ± 1%)	BurkholderiaCaballeroniaParaburkholderia_8371 (2 ± 0%)	Saprospiraceae_ge_3095 (2 ± 1%)	NS5_marine_group_4117 (2 ± 0%)
Color Key
Alphaproteobacteria
Verrucomicrobiae
Gammaproteobacteria
Campylobacteria
Bacteroidia
Acidimicrobiia
Cyanobacteria
Planctomycetacia
